# Supplementary material for: Outcome of Patients with NSCLC and Brain Metastases Treated with Immune Checkpoint Inhibitors in a ‘Real-Life’ Setting
Source: MDPI journal article supplement (doi:10.3390/cancers12123707), 2020-12-10
Supplement: s1 [file s1]

# Supplementary materials: Outcome of Patients with NSCLC and Brain Metastases Treated with Immune Checkpoint Inhibitors in a ‘Real-Life’ Setting

Marcus Skribek, Konstantinos Rounis, Dimitrios Makrakis, Sofia Agelaki, Dimitris Mavroudis, Luigi De Petris, Simon Ekman and Georgios Tsakonas

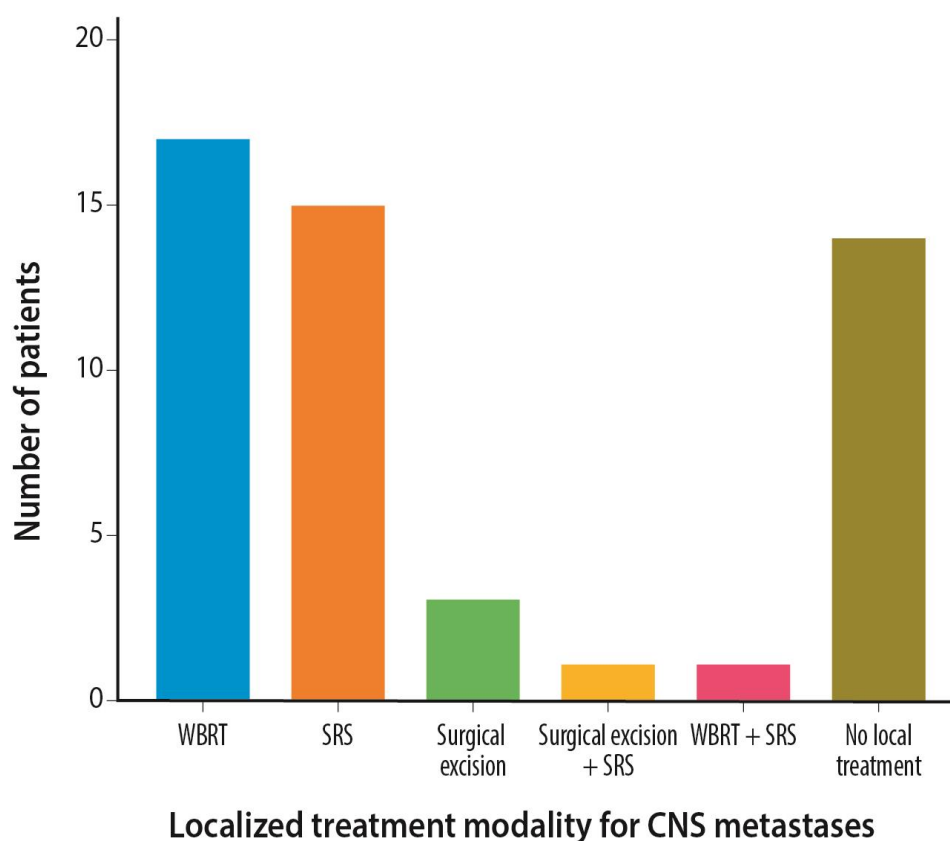

**Figure S1.** Local CNS treatment modalities that were administered to the patients. Abbreviations: WBRT = Whole Brain Radiotherapy, SRS = Stereotactic Radiosurgery.

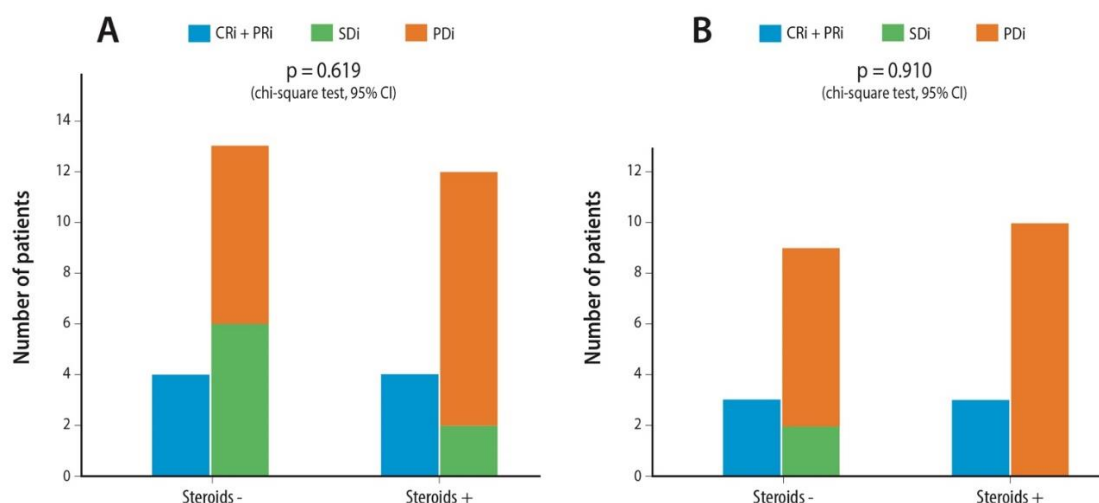

**Figure S2.** Effect of steroid administration on intracranial overall response rate **A**. In the whole patient population that was included for response assessment **B**. In the subgroup of patients with active BM. Abbreviations: CRI=Intracranial Complete Response, PRi=Intracranial Partial Response, SDi=Intracranial Stable Disease, PDi=Intracranial Progressive Disease.

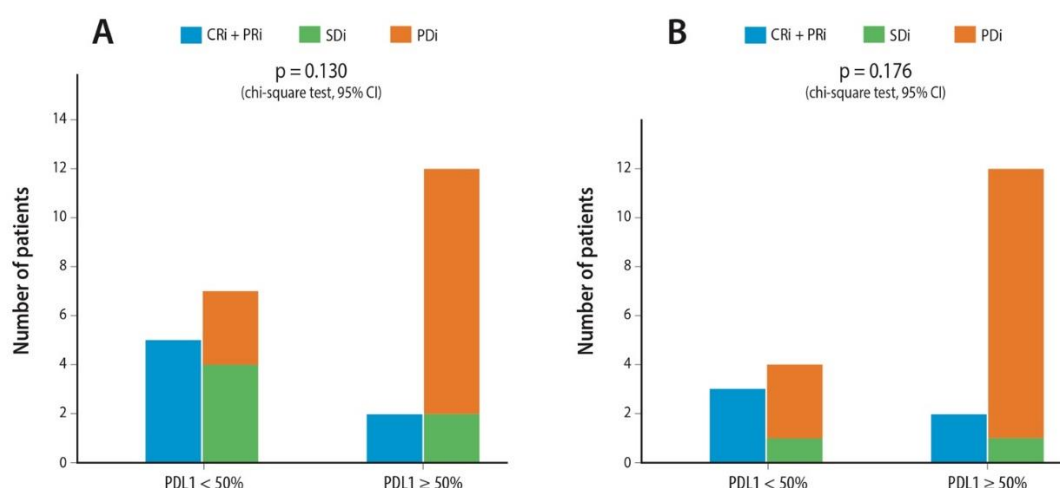

**Figure S3.** Effect of extracranial PD-L1 levels on intracranial overall response rate **A**. In the whole patient population that was included for response assessment **B**. In the subgroup of patients with active brain metastases. Abbreviations: CRI=Intracranial Complete Response, PRi=Intracranial Partial Response, SDi=Intracranial Stable Disease, PDi=Intracranial Progressive Disease, PD-L1=Programmed Death-Ligand 1.

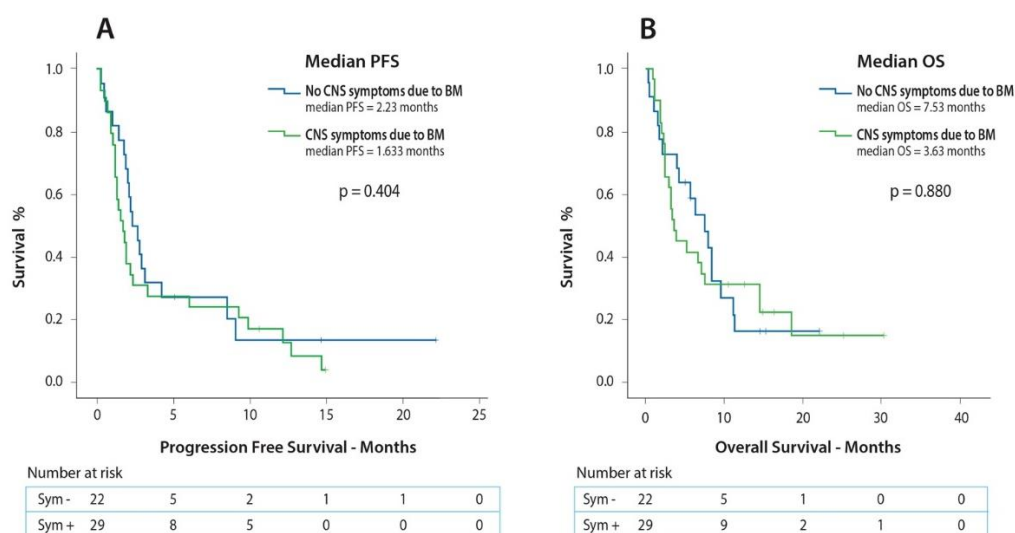

**Figure S4.** Effect of the presence of neurological symptoms attributed to brain metastases on **A.** PFS and **B.** OS in the subgroup of patients with brain metastases. Abbreviations: PFS=Progression-Free Survival, OS=Overall Survival, BM=Brain Metastases.

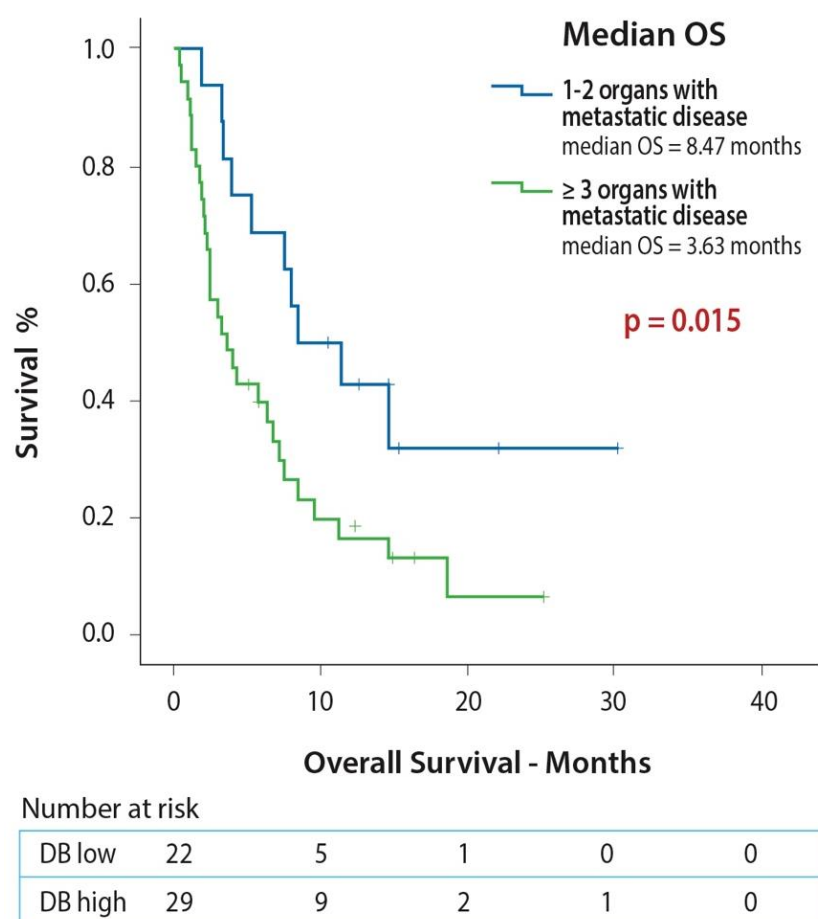

**Figure S5.** Effect of disease burden on OS in patients with baseline brain metastases before ICI initiation. Abbreviations: ICI=Immune Checkpoint Inhibitors, OS=Overall Survival, DB low=1-2 organs with metastatic disease, DB high= > 2 organs with metastatic disease.

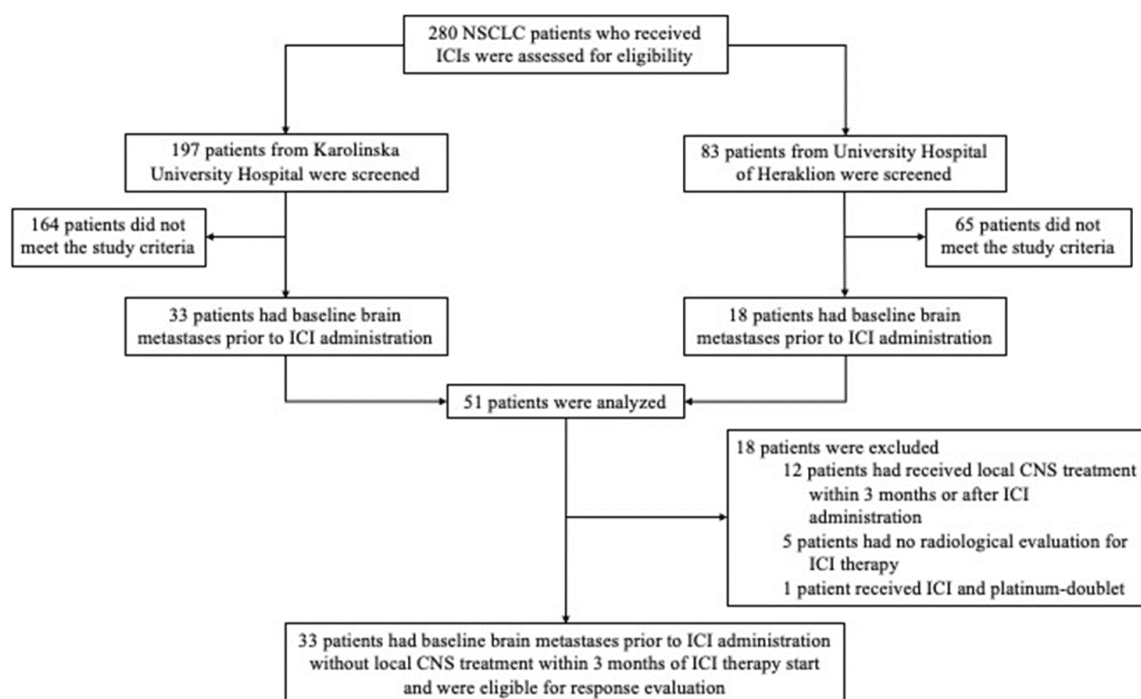

**Figure S6.** Study design. Abbreviations: ICIs=Immune Checkpoint Inhibitors.

**Table S1.** Effect of clinical parameters on discordance between intracranial and extracranial disease stabilization rates in response to ICI administration.

| Variable                                |                          | n  | Discordance* <sup>1</sup> | No discordance* <sup>1</sup> | p-Value (chi-square test) |
|-----------------------------------------|--------------------------|----|---------------------------|------------------------------|---------------------------|
| Age (years)                             | > 70                     | 13 | 4                         | 9                            | 0.590                     |
|                                         | ≤ 70                     | 20 | 8                         | 12                           |                           |
| PS                                      | 0-1                      | 25 | 11                        | 14                           | 0.107                     |
|                                         | 2                        | 8  | 1                         | 7                            |                           |
| Neurological symptoms* <sup>2</sup>     | Yes                      | 18 | 7                         | 11                           | 0.514                     |
|                                         | No                       | 15 | 5                         | 10                           |                           |
| Steroid administration* <sup>3</sup>    | Yes                      | 16 | 5                         | 11                           | 0.410                     |
|                                         | No                       | 17 | 7                         | 10                           |                           |
| Number of BM                            | > 3                      | 12 | 3                         | 9                            | 0.305                     |
|                                         | ≤ 3                      | 21 | 9                         | 12                           |                           |
| Line of treatment of ICI administration | 1st                      | 5  | 1                         | 4                            | 0.409                     |
|                                         | 2 <sup>nd</sup> or later | 28 | 11                        | 17                           |                           |
| Previous CNS radiotherapy               | Yes                      | 18 | 8                         | 10                           | 0.290                     |
|                                         | No                       | 15 | 4                         | 11                           |                           |
| Primary BM                              | Primary                  | 24 | 8                         | 16                           | 0.421                     |
|                                         | Non-primary              | 9  | 4                         | 5                            |                           |
| Active vs stable BM                     | Active                   | 25 | 6                         | 19                           | 0.015                     |
|                                         | Stable                   | 8  | 6                         | 2                            |                           |

\*1: Discordance among intracranial and extracranial disease stabilization (PR or SD) in response to ICI. \*2: Neurological symptoms attributed to BM. \*3: Steroid administration > 10 mg prednisolone equivalent for ≥ 10 days. Abbreviations: ICI=Immune Checkpoint Inhibitors, BM=Brain metastases, PR=Partial response, SD=Stable disease.

**Table S2.** Univariate and multivariate analysis on the effect of the studied patient parameters on intracranial time to progression after ICI administration.

| Variable                                                              | INTRACRANIAL TIME TO PROGRESSION |                 |                       |                 |
|-----------------------------------------------------------------------|----------------------------------|-----------------|-----------------------|-----------------|
|                                                                       | Univariate analysis              |                 | Multivariate analysis |                 |
|                                                                       | HR (95% CI)                      | <i>p</i> -Value | HR (95% CI)           | <i>p</i> -Value |
| Age > 70 years old                                                    | 2.045 (1.116–3.745)              | 0.021           | 1.567 (0.709–3.465)   | 0.267           |
| Performance status = 2                                                | 1.871 (0.959–3.457)              | 0.071           |                       |                 |
| Female gender                                                         | 1.261 (0.686–2.315)              | 0.455           |                       |                 |
| Smoker or former smoker                                               | 0.921 (0.383–2.187)              | 0.851           |                       |                 |
| Non-adenocarcinoma histology                                          | 1.979 (0.915–4.282)              | 0.083           |                       |                 |
| High disease burden* <sup>1</sup>                                     | 1.634 (0.849–3.142)              | 0.141           |                       |                 |
| > 3 CNS metastases                                                    | 0.672 (0.355–1.271)              | 0.222           |                       |                 |
| Largest CNS metastasis ≥ 3 cm                                         | 0.694 (0.366–1.319)              | 0.265           |                       |                 |
| Symptoms from CNS metastases                                          | 1.300 (0.707–2.387)              | 0.398           |                       |                 |
| Previous radiotherapy modality (> 3 months before ICI administration) | 0.463 (0.225–0.954)              | 0.037           | 1.469 (0.650–3.319)   | 0.355           |
| Active CNS metastases                                                 | 1.517 (0.663–3.471)              | 0.324           |                       |                 |
| ICI administration as second or subsequent line                       | 0.861 (0.397–1.870)              | 0.706           |                       |                 |
| Non-primary CNS metastases                                            | 1.688 (0.987–3.060)              | 0.099           |                       |                 |
| Steroid administration > 10 mg prednisolone equivalent for ≥ 10 days  | 1.401 (0.764–2.588)              | 0.276           |                       |                 |
| PD-L1 levels extracranially ≥ 50%                                     | 2.376 (1.161–4.862)              | 0.018           | 1.702 (0.779–3.720)   | 0.182           |

\*<sup>1</sup> High disease burden is defined as > 2 organs affected by metastatic disease. \*<sup>2</sup> Non-primary CNS metastases are defined as the absence of brain metastases at diagnosis but develop later during the course of the disease. Abbreviations: ICIs=Immune Checkpoint Inhibitors, PD-L1=Programmed Death-Ligand 1.
